# Supplementary material for: Drug Repurposing as an Antitumor Agent: Disulfiram-Mediated Carbonic Anhydrase 12 and Anion Exchanger 2 Modulation to Inhibit Cancer Cell Migration
Source: PubMed Central journal article supplement (PMC6767608; doi:10.3390/molecules24183409), 2019-09-19
Supplement: molecules-24-03409-s001.pdf [file molecules-24-03409-s001.pdf]

# Supplementary Figure 1. Hwang et al.

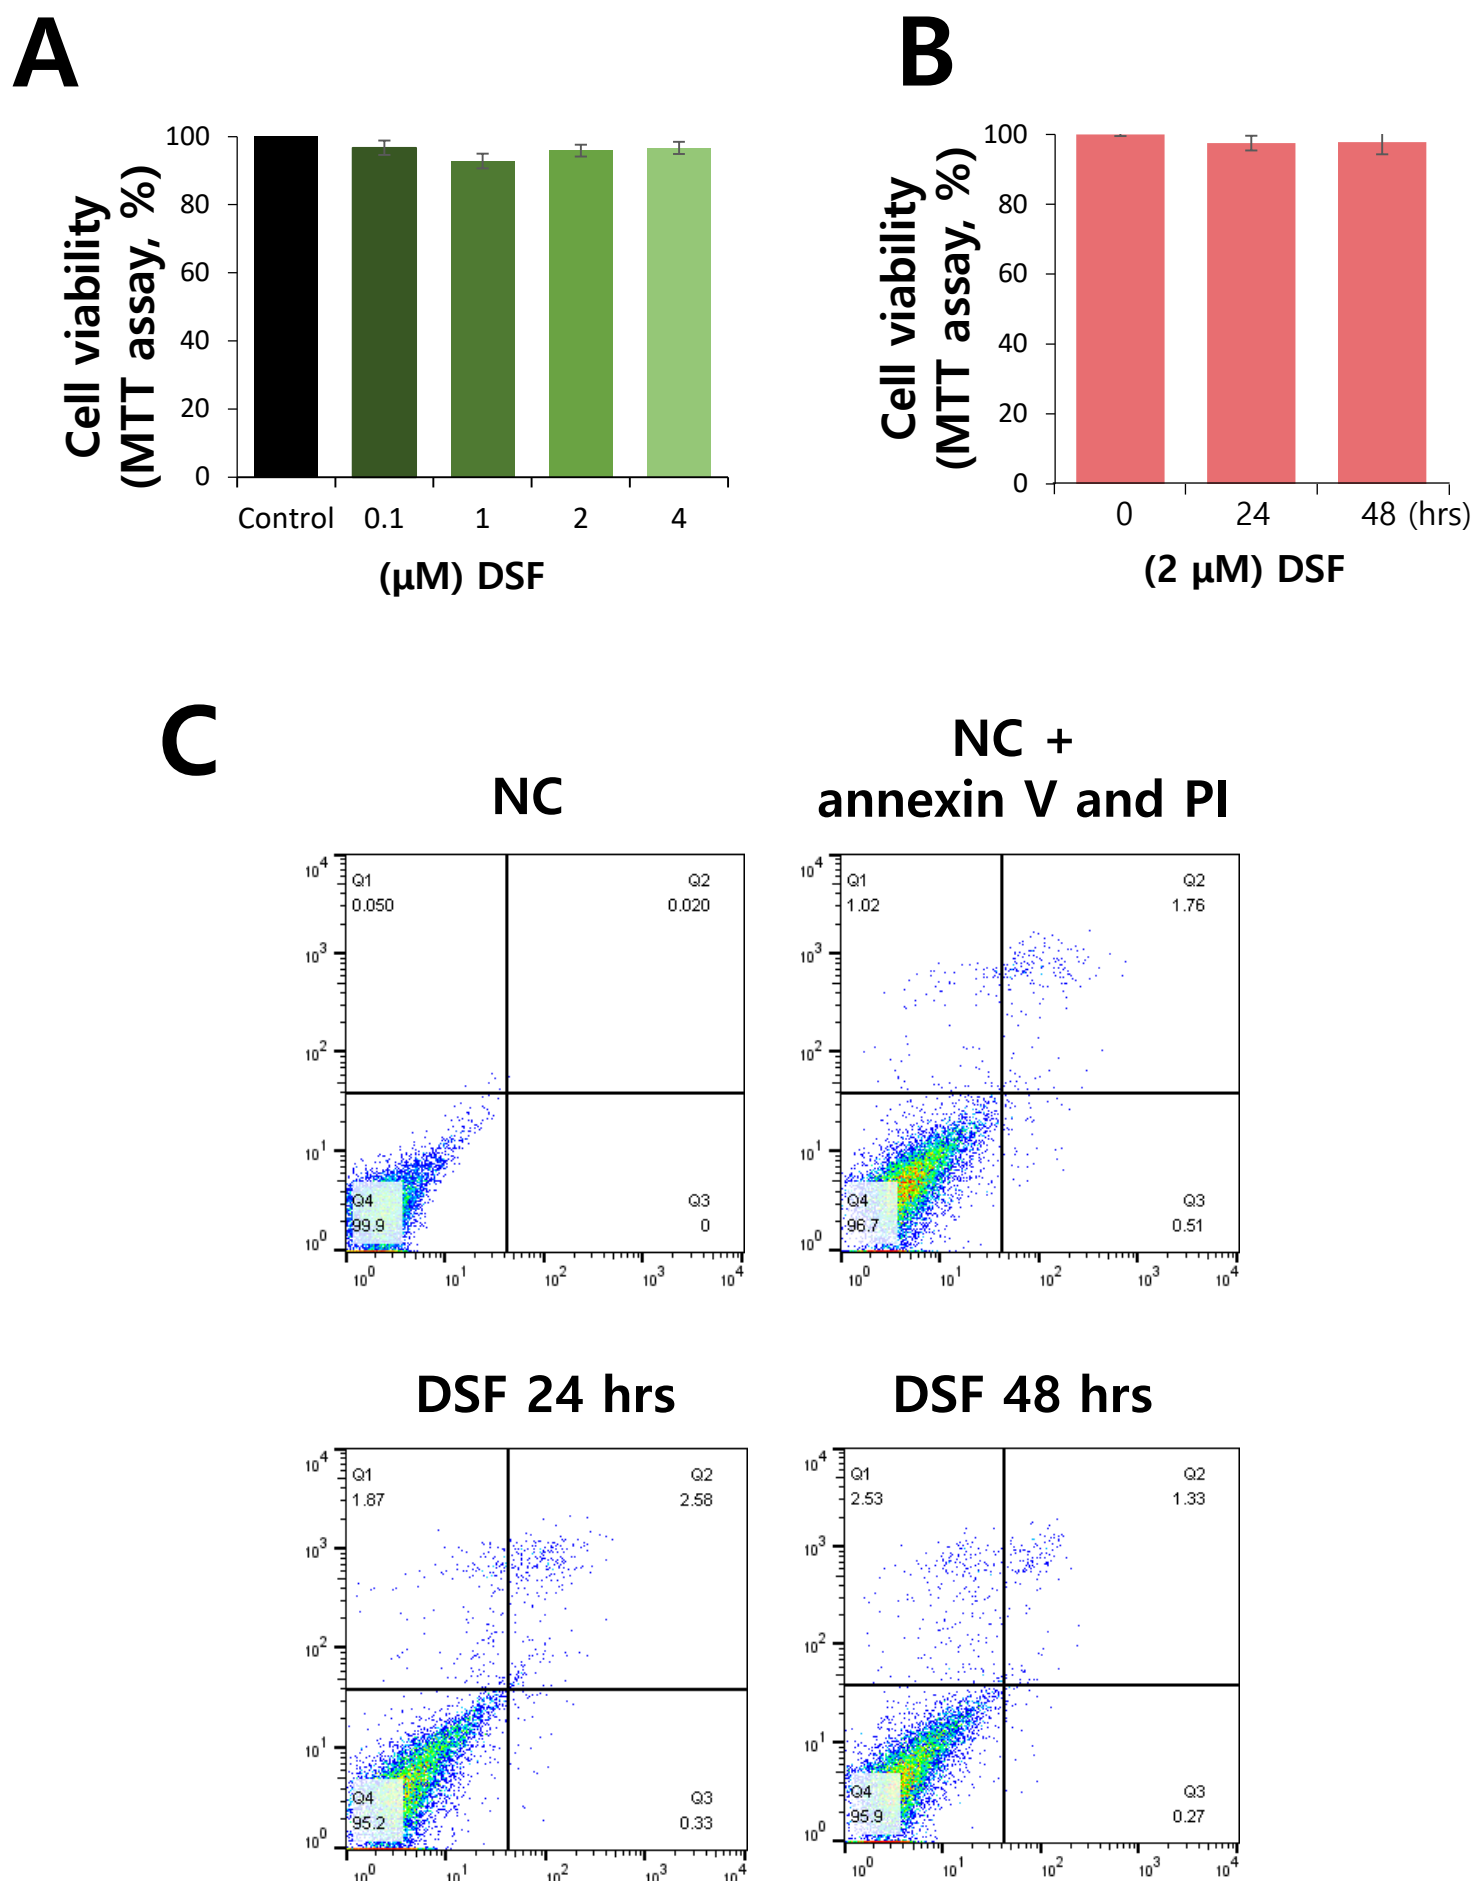

**Supplementary Figure 1. Cell viability of DSF-treated A549 cells.** Apoptosis analysis using MTT assay. The cells were treated with DSF of A549 cells with a dose (A) time (B)-dependent manner. (C) FACS analysis of apoptosis following treatment with 2  $\mu$ M DSF for indicated time.

## Supplementary Figure 2. Hwang et al.

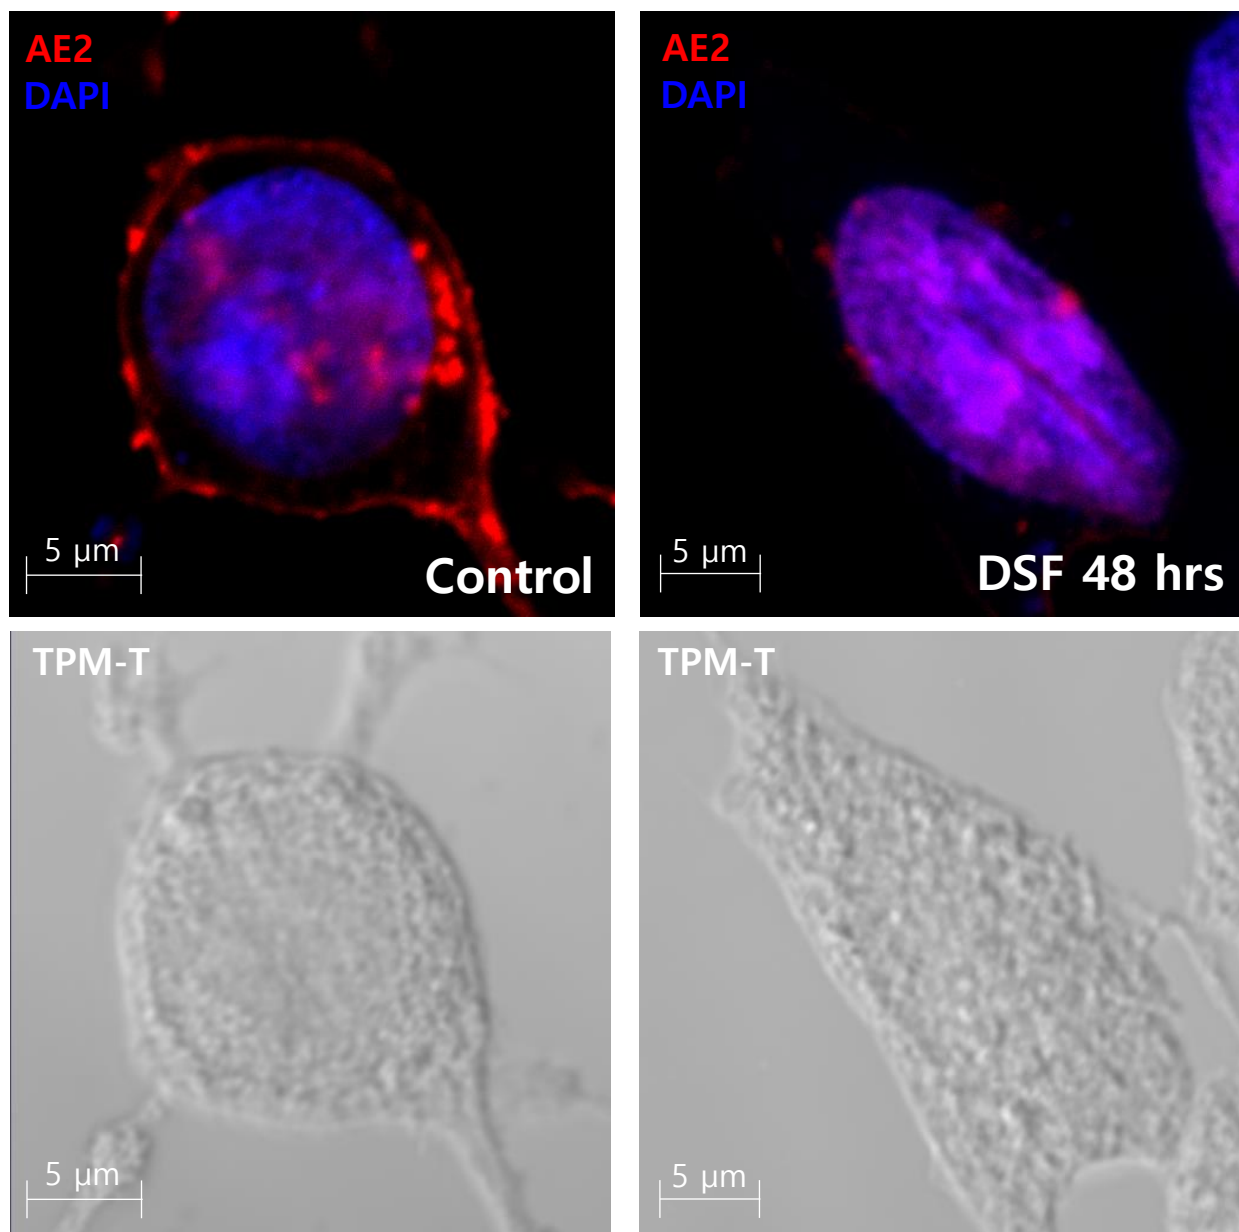

**Supplementary Figure 2. The effect of DSF on the localization of AE2 in AE2-overexpressed HEK293T cells.** Immunostaining of AE2 (red) and nucleus (DAPI, blue) and cell morphology (TPM-T, gray) following 2 μM DSF treatment for 48 hrs. The scale bars represent 5 μm.

## Supplementary Figure 3. Hwang et al.

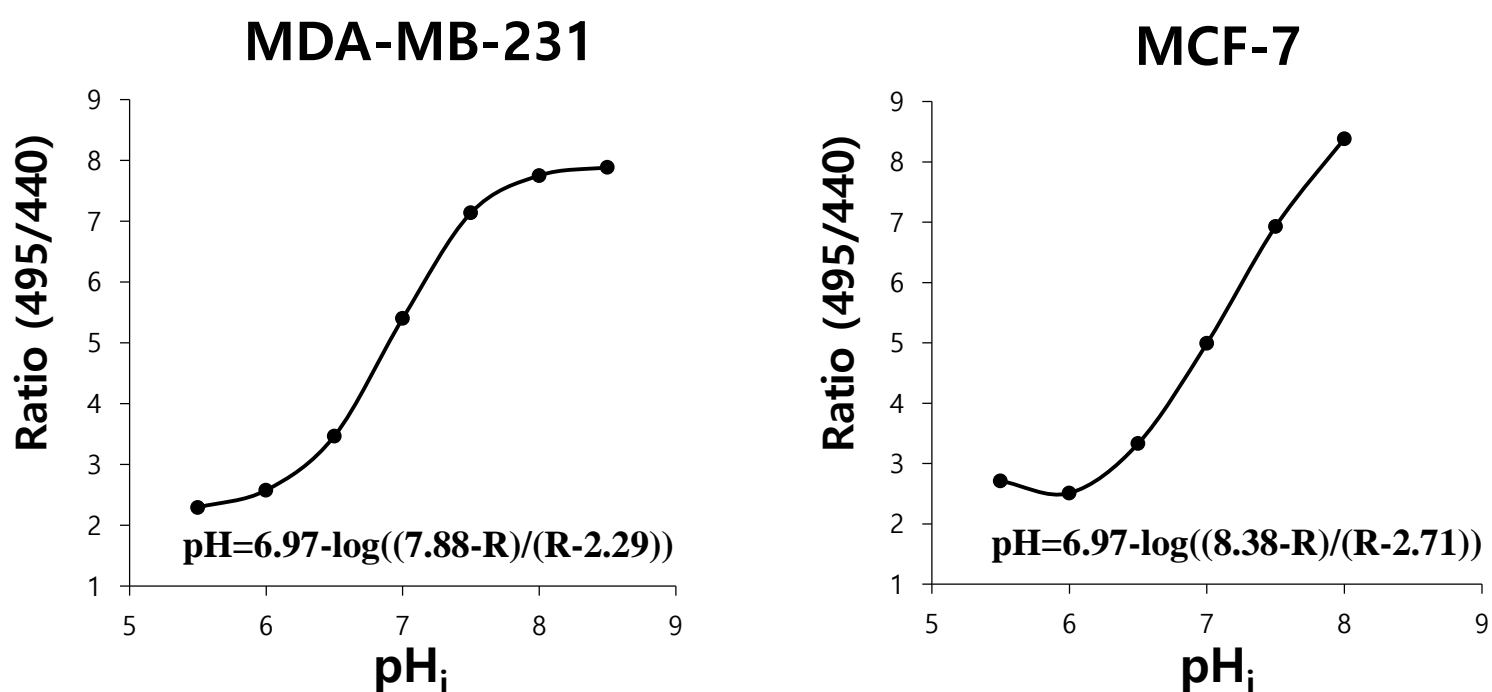

### Supplementary Figure 3. Calibration curve of intracellular pH change (ratio) of MDA-MB-231 and MCF-7 cells.

Calibration curve showing intracellular pH level of MDA-MB-231 cells ( $\text{pH} = 6.97 - \log(7.88 - R/R - 2.29)$ ) and MCF-7 cells ( $\text{pH} = 6.97 - \log(8.38 - R/R - 2.71)$ ).
